# Supplementary material
Source: MDPI journal article supplement (https://www.mdpi.com/2311-7524/9/2/284)
Supplement: s1 [file s1]

## Supplementary data

**Table S1.** Total soluble solids (TSS), titratable acidity (TA), and turbidity of coconut water of trimmed coconuts dipped in all chemical (C<sub>20</sub>N<sub>10</sub>-O<sub>3</sub>UFBs, C<sub>15</sub>N<sub>15</sub>-O<sub>3</sub>UFBs and C<sub>20</sub>N<sub>20</sub>) before storage compared with after storage for 30 days.

|                                                      | Before storage | After storage for 30 days | <i>t-test</i> |
|------------------------------------------------------|----------------|---------------------------|---------------|
| <b><i>TSS of coconut water</i></b>                   |                |                           |               |
| C <sub>20</sub> N <sub>20</sub>                      | 7.3            | 7.1                       | ns            |
| C <sub>20</sub> N <sub>10</sub> -O <sub>3</sub> UFBs | 7.2            | 7.3                       | ns            |
| C <sub>15</sub> N <sub>15</sub> -O <sub>3</sub> UFBs | 7.4            | 7.1                       | ns            |
| <b><i>TA of coconut water</i></b>                    |                |                           |               |
| C <sub>20</sub> N <sub>20</sub>                      | 0.089          | 0.047                     | *             |
| C <sub>20</sub> N <sub>10</sub> -O <sub>3</sub> UFBs | 0.095          | 0.051                     | *             |
| C <sub>15</sub> N <sub>15</sub> -O <sub>3</sub> UFBs | 0.080          | 0.041                     | *             |
| <b><i>Turbidity of coconut water</i></b>             |                |                           |               |
| C <sub>20</sub> N <sub>20</sub>                      | 92             | 88                        | ns            |
| C <sub>20</sub> N <sub>10</sub> -O <sub>3</sub> UFBs | 92             | 91                        | ns            |
| C <sub>15</sub> N <sub>15</sub> -O <sub>3</sub> UFBs | 91             | 87                        | ns            |

\*: significantly different at  $p < 0.05$ ; ns: not significantly different

**Table S2.** Total soluble solids (TSS), and titratable acidity (TA) of coconut meat of trimmed coconuts dipped in all chemical (C<sub>20</sub>N<sub>10</sub>-O<sub>3</sub>UFBs, C<sub>15</sub>N<sub>15</sub>-O<sub>3</sub>UFBs and C<sub>20</sub>N<sub>20</sub>) before storage compared with after storage for 30 days.

|                                                      | Before storage | After storage for 30 days | <i>t-test</i> |
|------------------------------------------------------|----------------|---------------------------|---------------|
| <b><i>TSS of coconut meat</i></b>                    |                |                           |               |
| C <sub>20</sub> N <sub>20</sub>                      | 8.2            | 8.4                       | ns            |
| C <sub>20</sub> N <sub>10</sub> -O <sub>3</sub> UFBs | 9.6            | 8.2                       | ns            |
| C <sub>15</sub> N <sub>15</sub> -O <sub>3</sub> UFBs | 9.0            | 8.4                       | *             |
| <b><i>TA of coconut meat</i></b>                     |                |                           |               |
| C <sub>20</sub> N <sub>20</sub>                      | 0.054          | 0.054                     | ns            |
| C <sub>20</sub> N <sub>10</sub> -O <sub>3</sub> UFBs | 0.077          | 0.047                     | ns            |
| C <sub>15</sub> N <sub>15</sub> -O <sub>3</sub> UFBs | 0.074          | 0.050                     | ns            |

\*: significantly different at  $p < 0.05$ ; ns: not significantly different

**Table S3.** Whiteness, browning index, total phenolic content and PPO activity of coconut mesocarp of trimmed coconuts dipped in all chemical (C<sub>20</sub>N<sub>10</sub>-O<sub>3</sub>UFBs, C<sub>15</sub>N<sub>15</sub>-O<sub>3</sub>UFBs and C<sub>20</sub>N<sub>20</sub>) before storage compared with after storage for 30 days.

|                                                           | Before storage | After storage for 30 days | <i>t-test</i> |
|-----------------------------------------------------------|----------------|---------------------------|---------------|
| <b><i>Whiteness of coconut mesocarp</i></b>               |                |                           |               |
| C <sub>20</sub> N <sub>20</sub>                           | 27.32          | 30.11                     | *             |
| C <sub>20</sub> N <sub>10</sub> -O <sub>3</sub> UFBs      | 27.50          | 28.66                     | *             |
| C <sub>15</sub> N <sub>15</sub> -O <sub>3</sub> UFBs      | 27.68          | 30.88                     | *             |
| <b><i>Browning index of coconut mesocarp</i></b>          |                |                           |               |
| C <sub>20</sub> N <sub>20</sub>                           | 24.27          | 20.84                     | *             |
| C <sub>20</sub> N <sub>10</sub> -O <sub>3</sub> UFBs      | 25.42          | 21.29                     | *             |
| C <sub>15</sub> N <sub>15</sub> -O <sub>3</sub> UFBs      | 23.95          | 19.59                     | *             |
| <b><i>Total phenolic content of coconut meso-carp</i></b> |                |                           |               |
| C <sub>20</sub> N <sub>20</sub>                           | 4918.33        | 5384.83                   | ns            |
| C <sub>20</sub> N <sub>10</sub> -O <sub>3</sub> UFBs      | 4286.25        | 6008.92                   | *             |
| C <sub>15</sub> N <sub>15</sub> -O <sub>3</sub> UFBs      | 4601.08        | 5392.67                   | ns            |
| <b><i>PPO activity of coconut mesocarp</i></b>            |                |                           |               |
| C <sub>20</sub> N <sub>20</sub>                           | 0.64           | 0.80                      | ns            |
| C <sub>20</sub> N <sub>10</sub> -O <sub>3</sub> UFBs      | 0.47           | 0.57                      | ns            |
| C <sub>15</sub> N <sub>15</sub> -O <sub>3</sub> UFBs      | 0.59           | 0.75                      | *             |

\*: significantly different at  $p<0.05$ ; ns: not significantly different
